# Supplementary material for: Synthesis and properties of polyesters derived from renewable eugenol and α,ω-diols via a continuous overheating method
Source: Royal Society of Chemistry journal article supplement (doi:10.1039/c5py01075f), 2015-01-01
Supplement: c5py01075f1.pdf [file c5py01075f1.pdf]

**Supplementary Information for**  
**Synthesis and properties of polyesters derived from renewable**  
**eugenol and  $\alpha,\omega$ -diols via a continuous overheating method**

Keling Hu,<sup>a</sup> Dongping Zhao,<sup>a</sup> Guolin Wu<sup>\*,a</sup> and Jianbiao Ma<sup>\*,b</sup>

<sup>a</sup> Key Laboratory of Functional Polymer Materials of MOE, Institute of Polymer

Chemistry, Nankai University, Tianjin 300071, P R China

<sup>b</sup> School of Chemistry and Chemical Engineering, Tianjin University of Technology,

Tianjin 300191, P R China

Corresponding author: guolinwu@hotmail.com

**Table S1** Polymerization strategies for the synthesis of **PM2- $\omega$ s** with  $\alpha,\omega$ -diols

| $\alpha,\omega$ -diols | Reaction time (h) | Transesterification temperature (°C) |     |     |     | Polycondensation temperature (°C) |     |     |
|------------------------|-------------------|--------------------------------------|-----|-----|-----|-----------------------------------|-----|-----|
|                        |                   | 100                                  | 120 | 140 | 160 | 160                               | 180 | 200 |
| 1,2-ethylene glycol    | 0.5               | 1                                    | 1   | 1   | 2   | 2                                 | 2   | 1   |
| 1,3-propanediol        | 0.5               | 1                                    | 1   | 1   | 2   | 2                                 | 2   | 1   |
| 1,4-butanediol         | 0.5               | 1                                    | 1   | 1   | 2   | 2                                 | 2   | 1   |
| 1,6-hexanediol         | 0.5               | 1                                    | 1   | 1   | 2   | 1                                 | 2   | 1   |
| 1,10-decanediol        | 0.5               | 0.5                                  | 1   | 1   | 2   | 1                                 | 2   | 1   |
| 1,12-dodecanediol      | 0.5               | 0.5                                  | 1   | 1   | 2   | 1                                 | 2   | 1   |

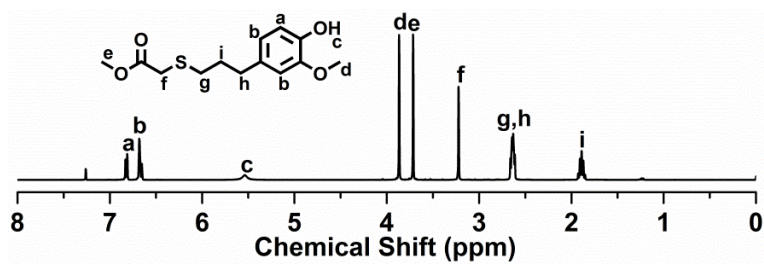

**Fig. S1** <sup>1</sup>H NMR spectrum of **P1**

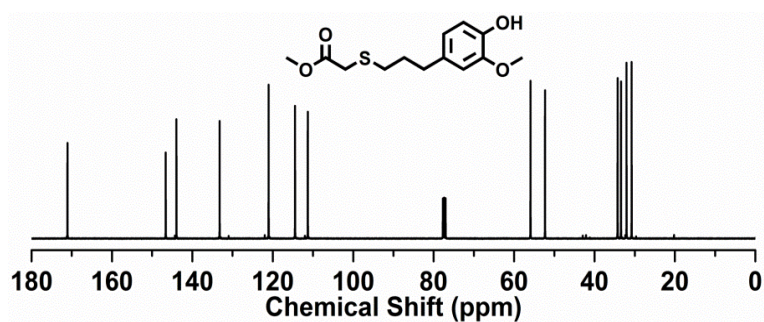

**Fig. S2** <sup>13</sup>C NMR spectrum of **P1**

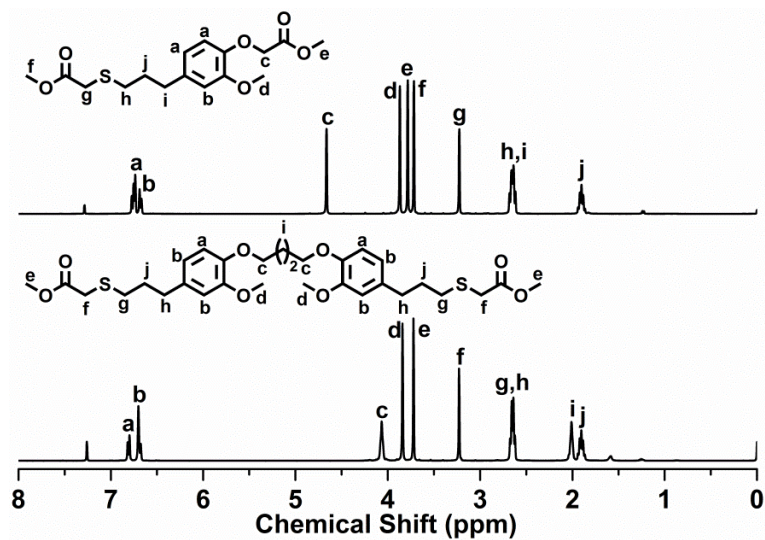

**Fig. S3**  $^1\text{H}$  NMR spectra of **M1** and **M2**

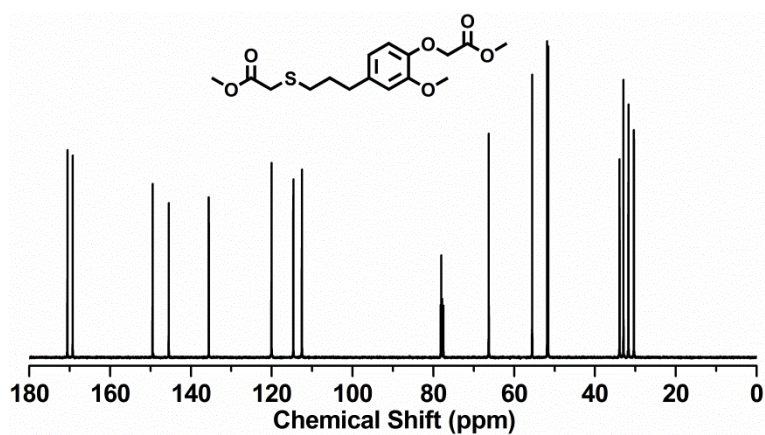

**Fig. S4**  $^{13}\text{C}$  NMR spectrum of **M1**

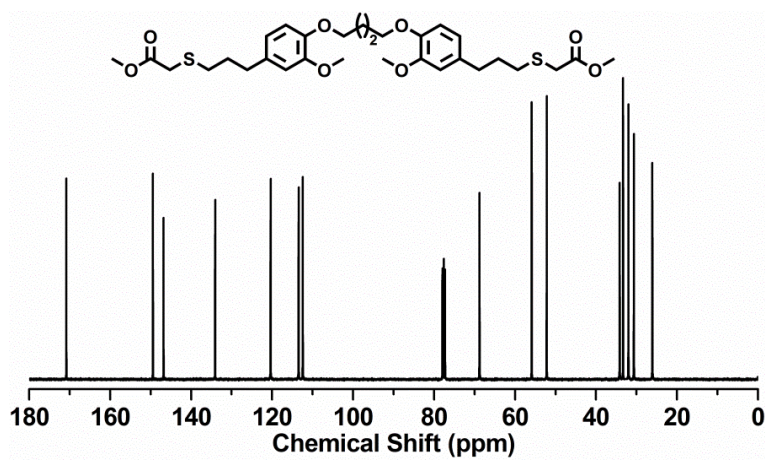

**Fig. S5**  $^{13}\text{C}$  NMR spectrum of **M2**

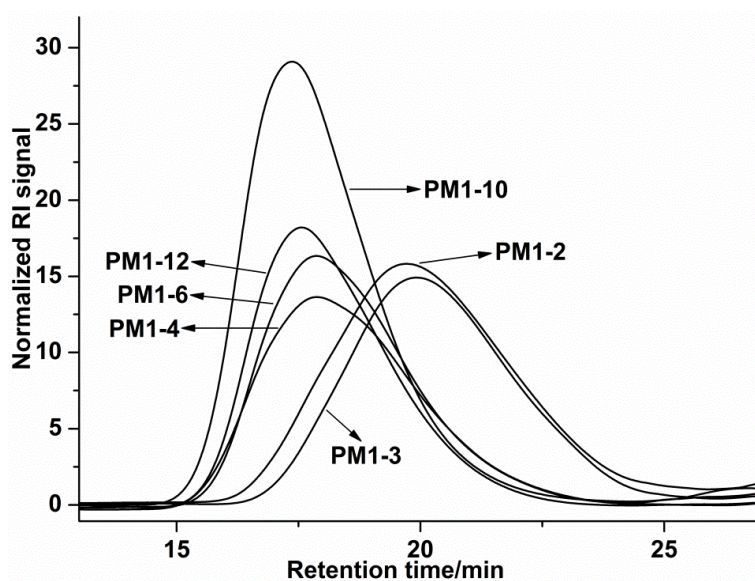

**Fig. S6** SEC traces of PM1- $\omega$ s

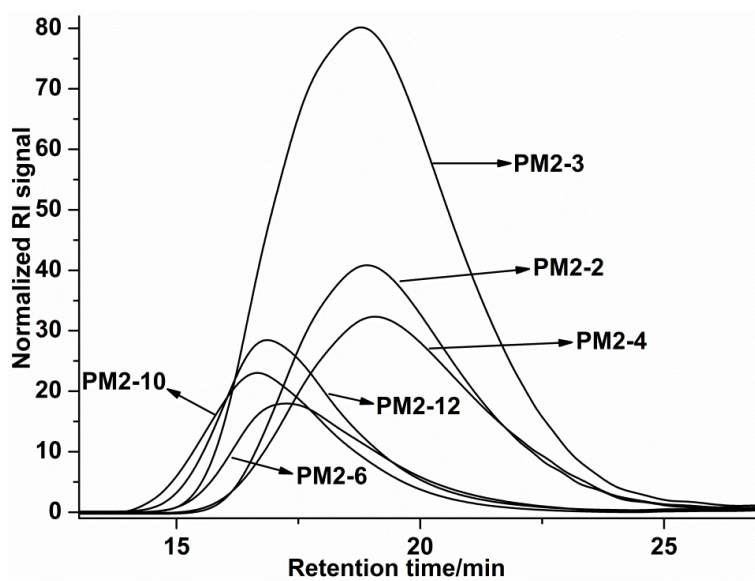

**Fig. S7** SEC traces of PM2- $\omega$ s

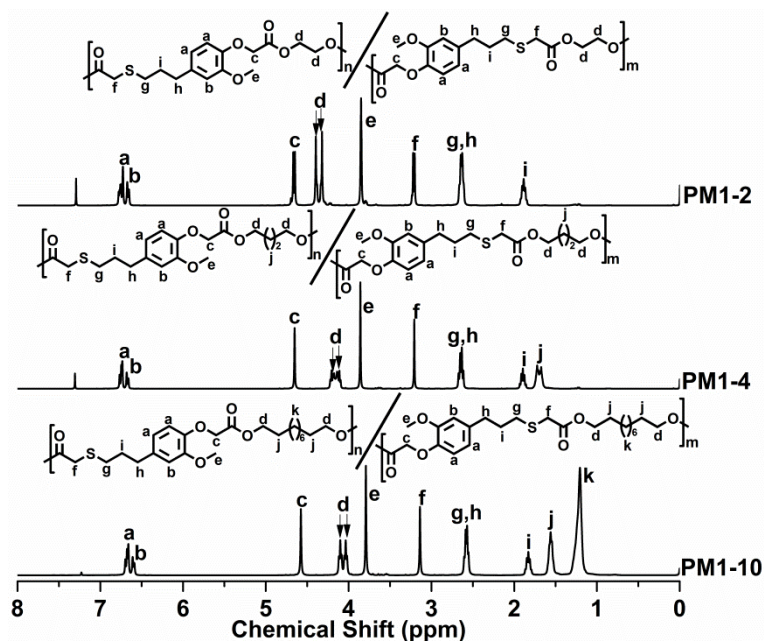

**Fig. S8**  $^1\text{H}$  NMR spectra of PM1-2, PM1-4 and PM1-10

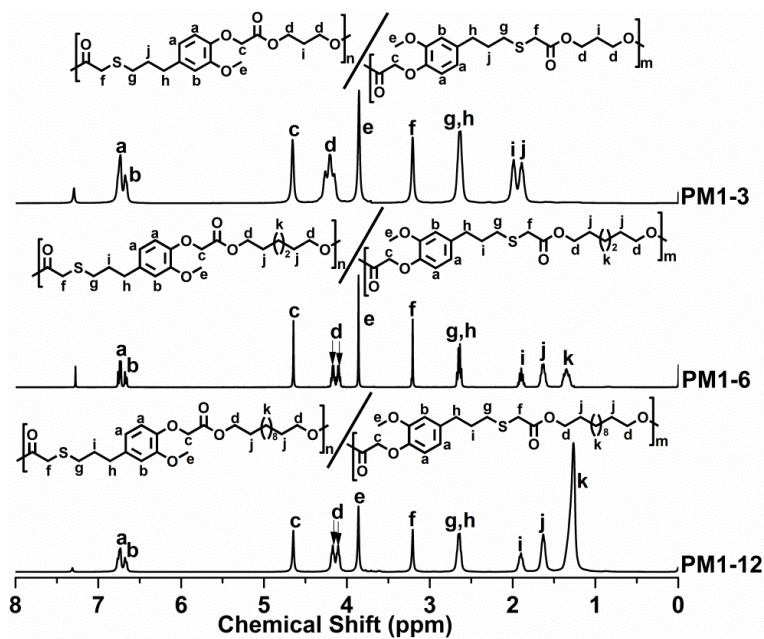

**Fig. S9**  $^1\text{H}$  NMR spectra of PM1-3, PM1-6 and PM1-12

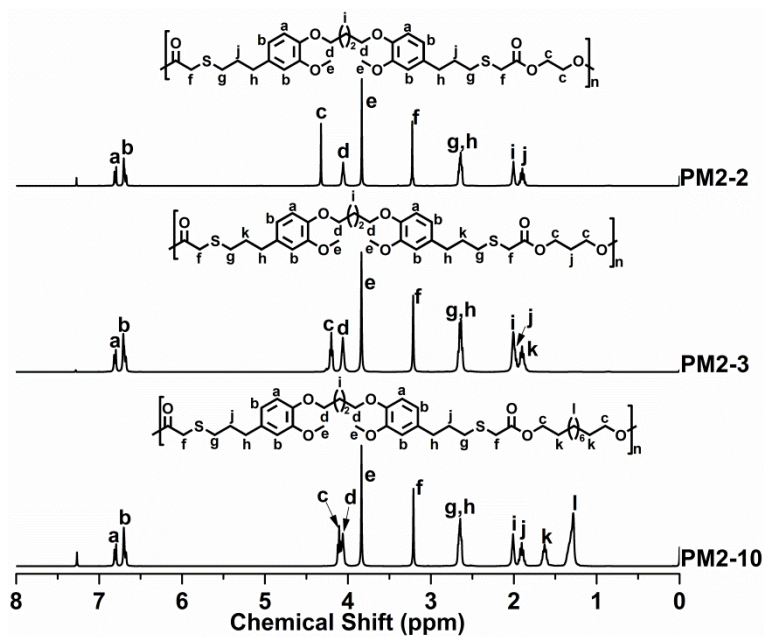

**Fig. S10**  $^1\text{H}$  NMR spectra of **PM2-2**, **PM2-3** and **PM2-10**

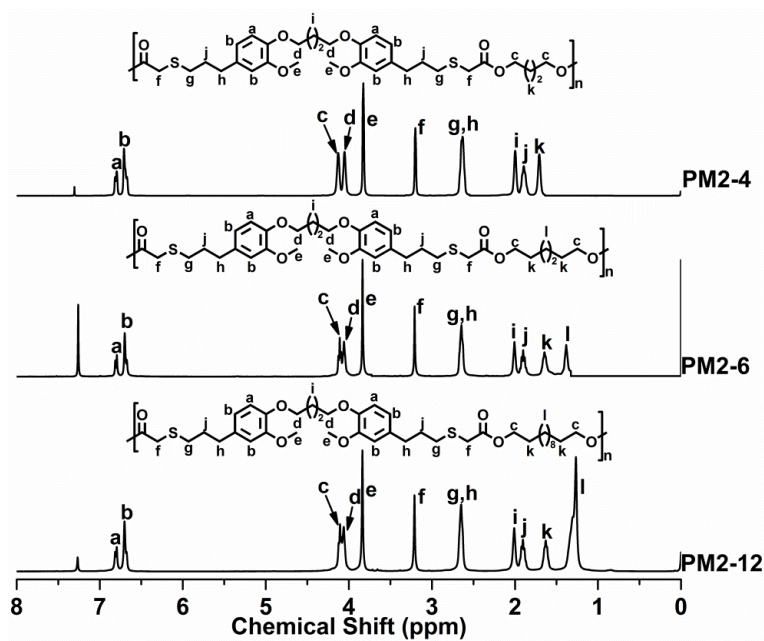

**Fig. S11**  $^1\text{H}$  NMR spectra of **PM2-4**, **PM2-6** and **PM2-12**

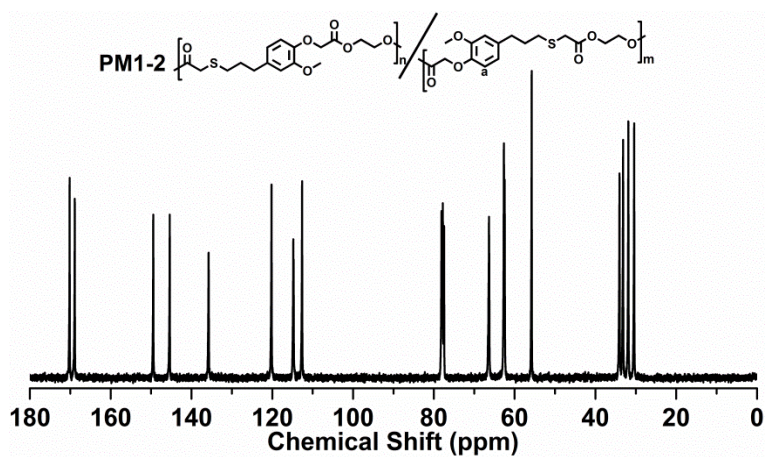

Fig. S12  $^{13}\text{C}$  NMR spectrum of PM1-2

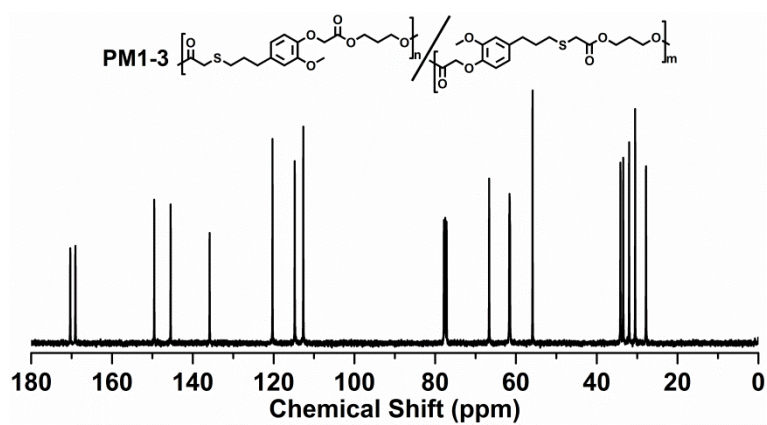

Fig. S13  $^{13}\text{C}$  NMR spectrum of PM1-3

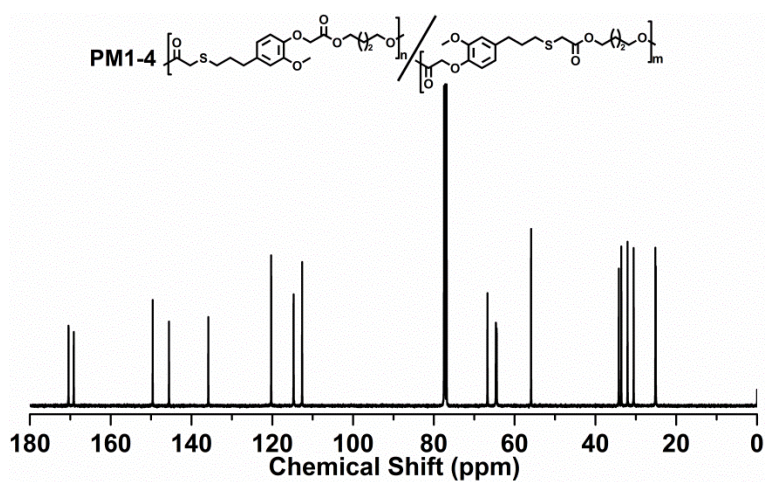

Fig. S14  $^{13}\text{C}$  NMR spectrum of PM1-4

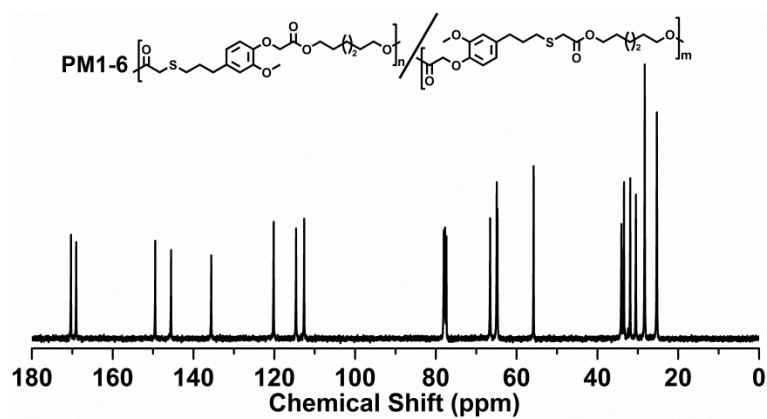

Fig. S15  $^{13}\text{C}$  NMR spectrum of PM1-6

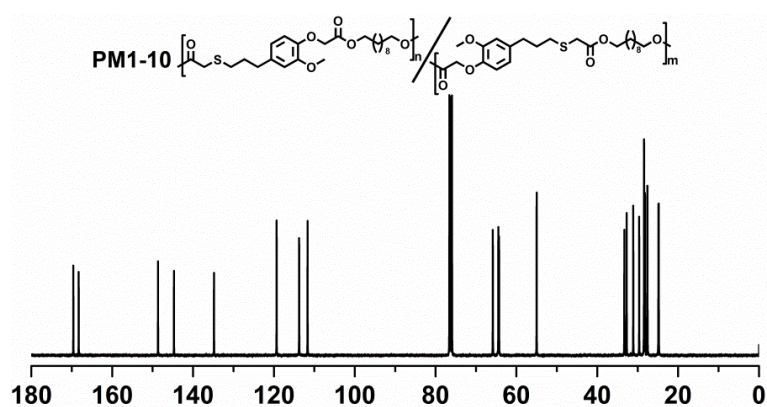

Fig. S16  $^{13}\text{C}$  NMR spectrum of PM1-10

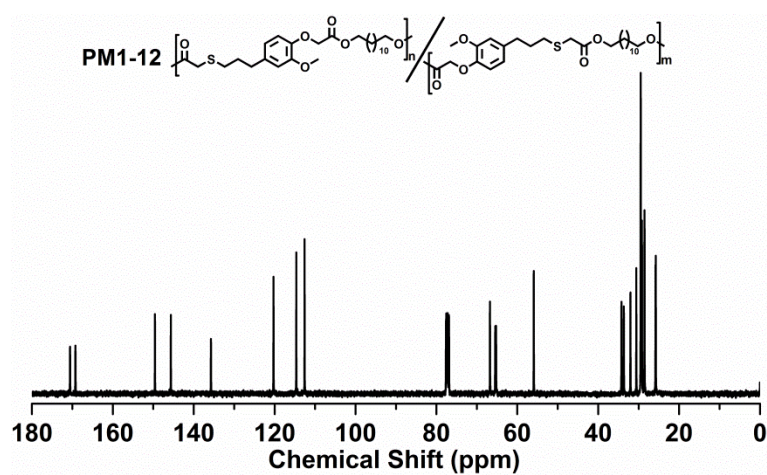

Fig. S17  $^{13}\text{C}$  NMR spectrum of PM1-12



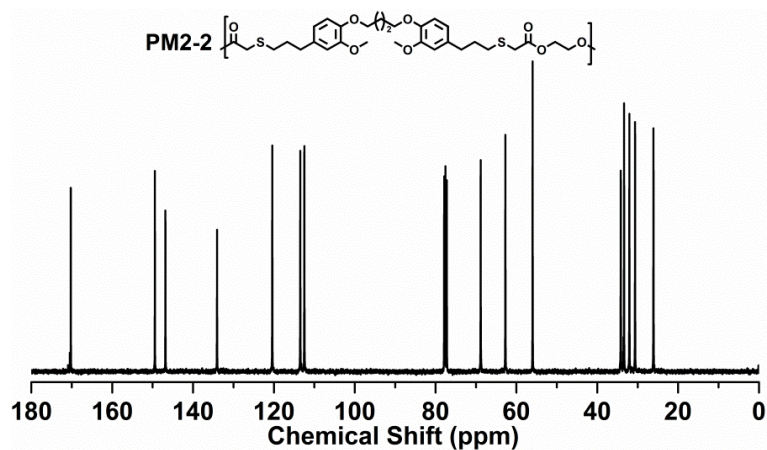

**Fig. S18**  $^{13}\text{C}$  NMR spectrum of **PM2-2**

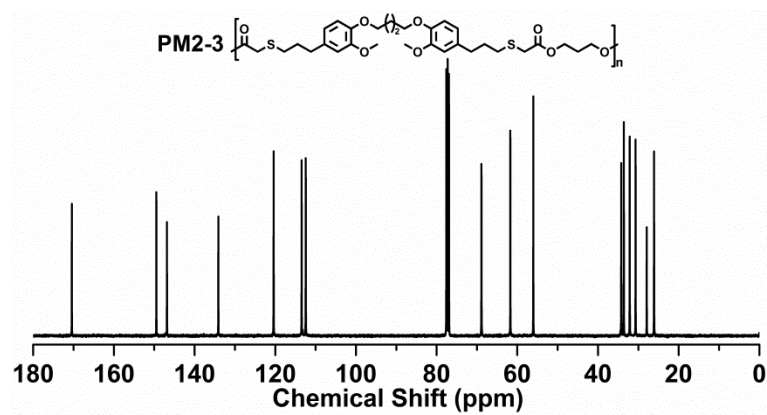

**Fig. S19**  $^{13}\text{C}$  NMR spectrum of **PM2-3**

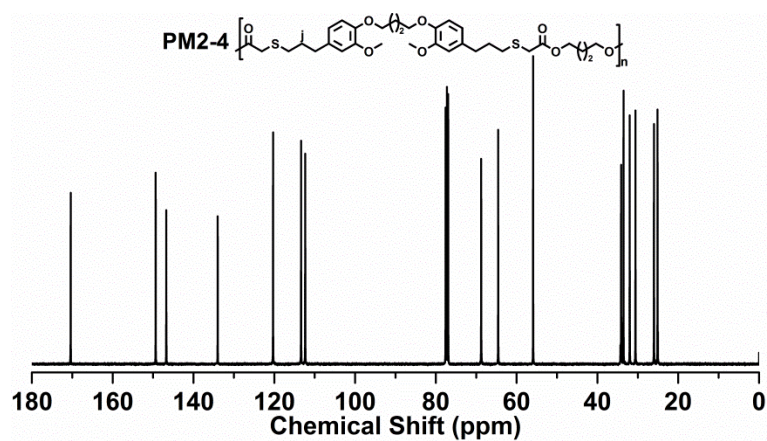

**Fig. S20**  $^{13}\text{C}$  NMR spectrum of **PM2-4**

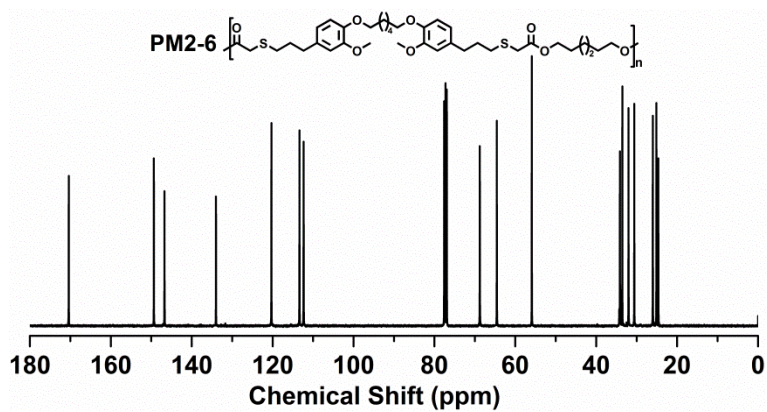

Fig. S21  $^{13}\text{C}$  NMR spectrum of PM2-6

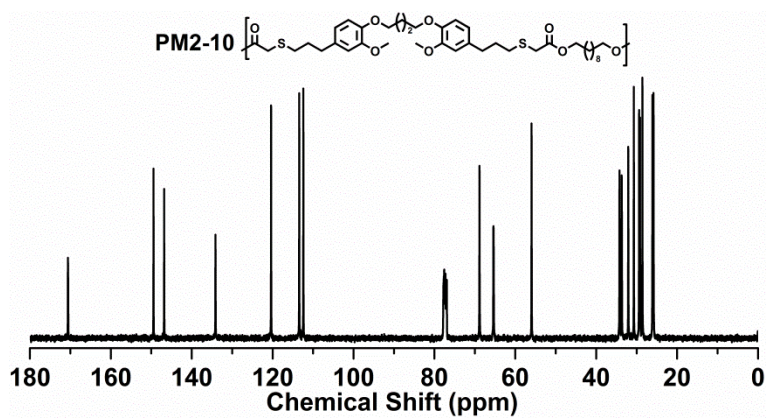

Fig. S22  $^{13}\text{C}$  NMR spectrum of PM2-10

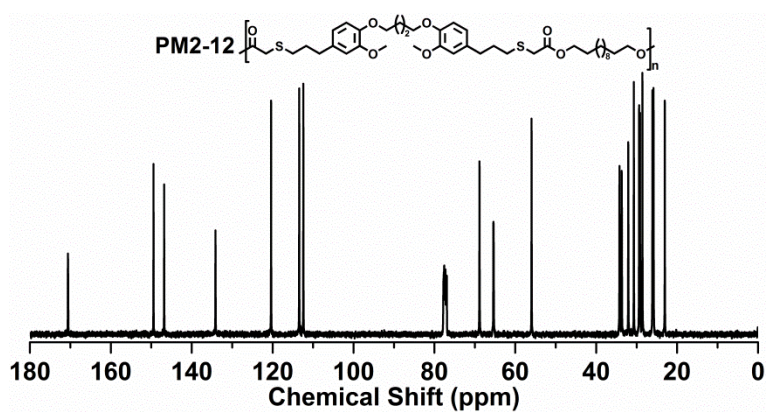

Fig. S23  $^{13}\text{C}$  NMR spectrum of PM2-12

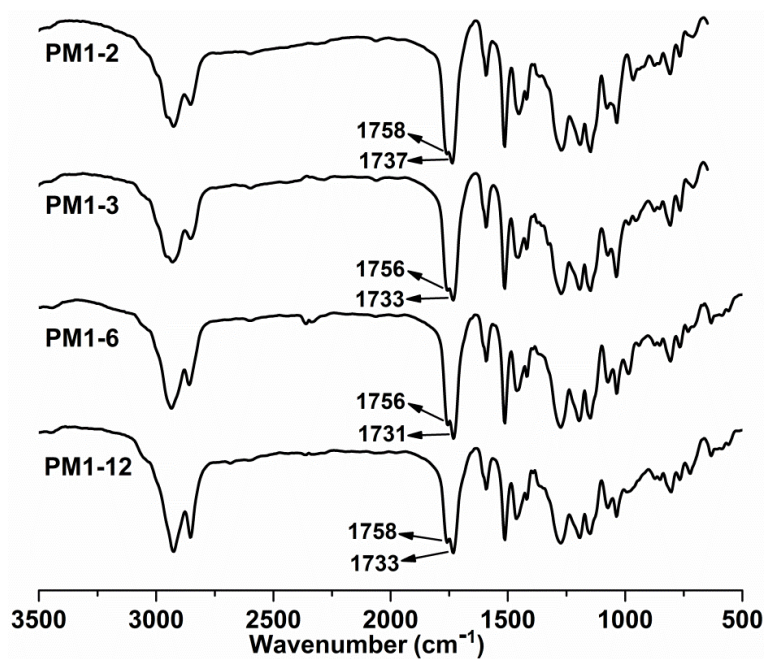

**Fig. S24** FTIR spectra of **PM1-2, PM1-3, PM1-6 and PM1-12**

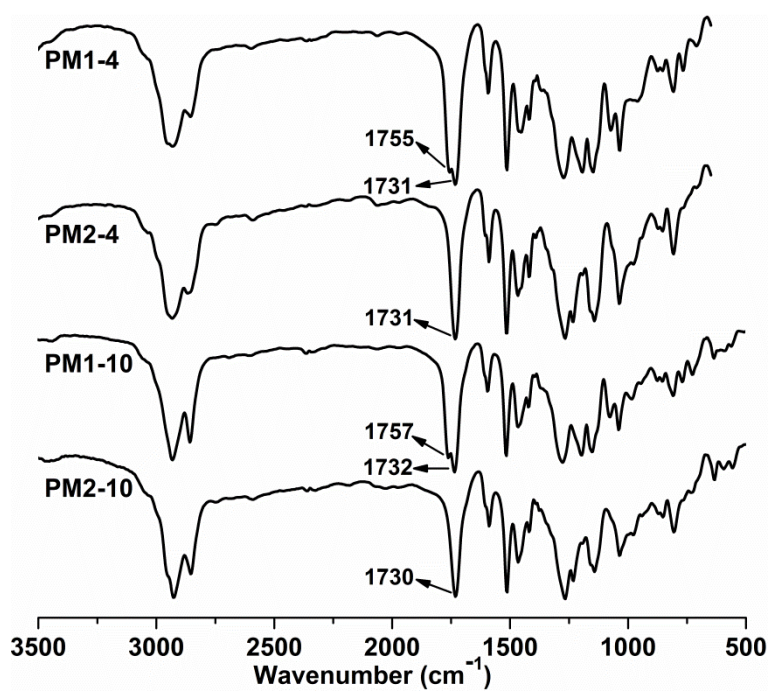

**Fig. S25** FTIR spectra of **PM1-4, PM2-4, PM1-10 and PM2-10**

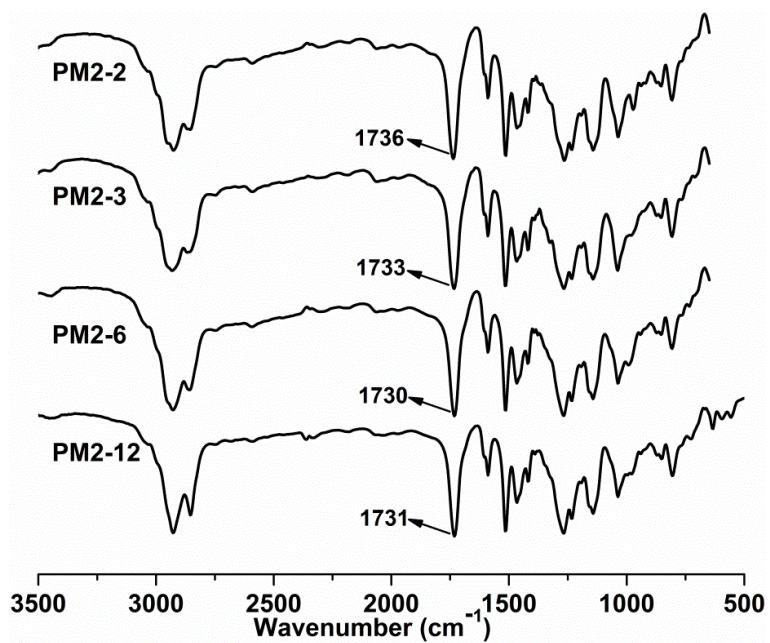

Fig. S26 FTIR spectra of **PM2-2**, **PM2-3**, **PM2-6** and **PM2-12**

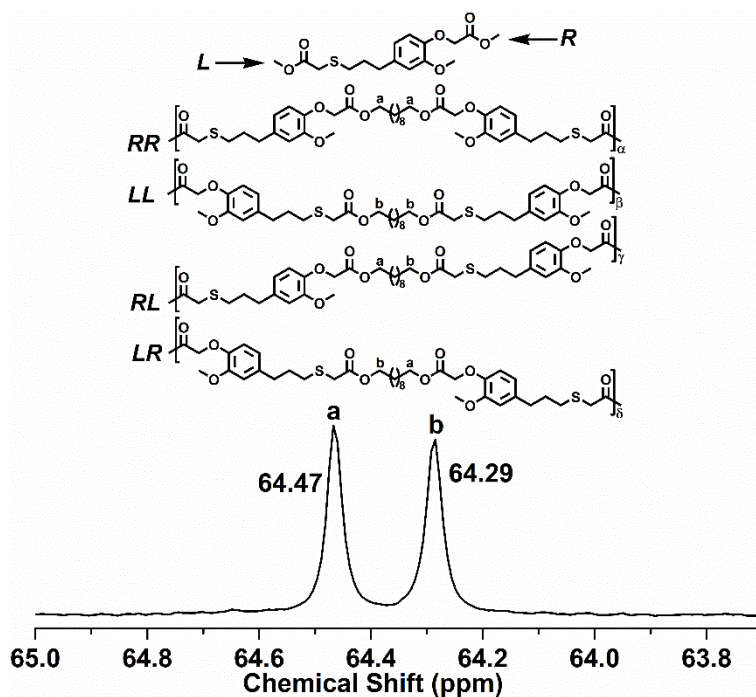

Fig. S27  $^{13}\text{C}$  NMR signals used for the microstructure analysis of **PM1-10** with schematic representation of dyads to which they are assigned.

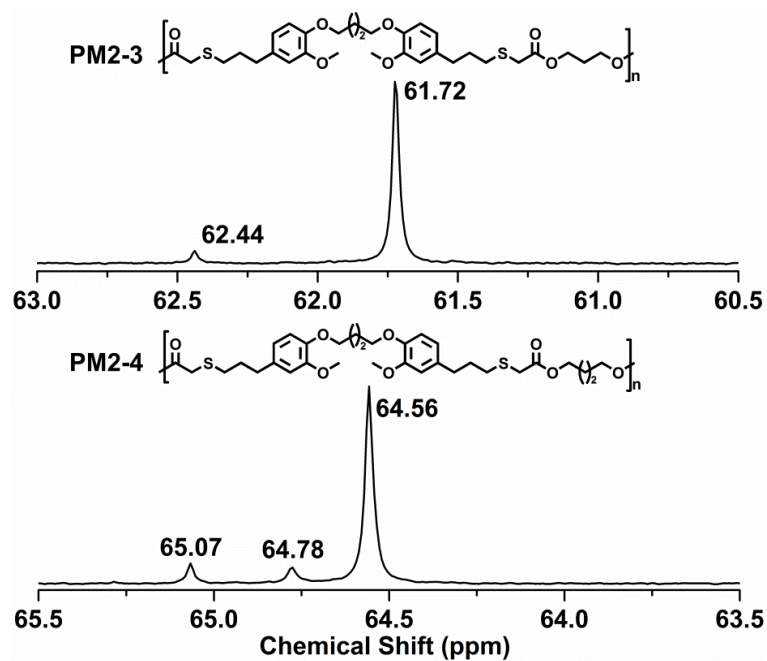

Fig. S28  $^{13}\text{C}$  NMR signal of PM2-3 and PM2-4 for microstructure analysis

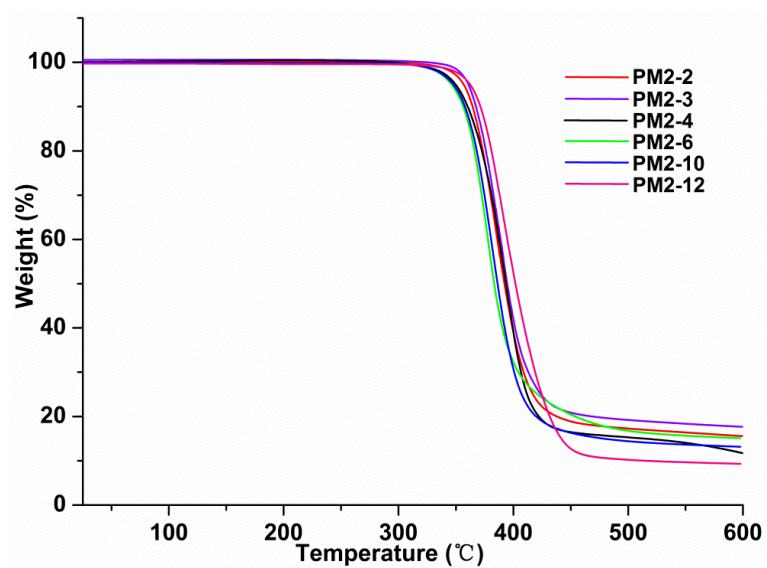

Fig. S29 TGA curves of PM2- $\omega$ s at a heating rate of 10  $^{\circ}\text{C min}^{-1}$

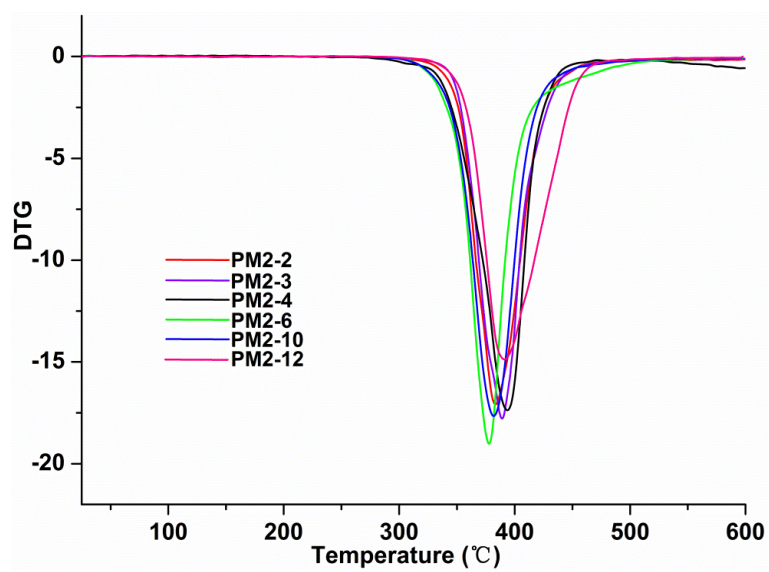

**Fig. S30** TGA derivative curves of **PM2- $\omega$ s** at a heating rate of  $10\text{ }^{\circ}\text{C min}^{-1}$
